# Supplementary material for: Expanding SPTAN1 monoallelic variant associated disorders: From epileptic encephalopathy to pure spastic paraplegia and ataxia
Source: PubMed Central journal article supplement (PMC10620943; doi:10.1016/j.gim.2022.09.013), 2023-01
Supplement: mmc1.pdf [file mmc1.pdf]

## SUPPLEMENTAL DATA

**1. Supp Method:** Western blot - Immunocytochemistry and confocal microscopy.

**2. Case studies**

**3. Tables :**

**Table S1:** *SPTAN1* probably damaging variants in the 100K GP cohorts

**Table S2:** *SPTAN1* (NM\_001130438.3) variants reported in the study and in silico prediction score.

**Table S3:** DynaMut prediction outcomes for the missense variants identified in the study.

**Table S4:** Insilico predictions of missense *SPTAN1* (NM\_001130438.3) previously reported variants

**4. Figures**

**Figure S1:** IGV for *SPTAN1* gene deletion in family 7.

**Figure S2:** Structural impact of *SPTAN1* missense variants

**5. Videos**

**Video S1:** Phenotype of patient 1 with the recurrent *SPTAN1*; p. Arg19Trp variant, exhibiting a spastic and scissoring gait.

**Video S2:** Ataxic phenotype of nine-month-old C57BL/6J mouse with p. Arg1098Gln variant showing obvious motor and coordination difficulty.

## **Supp Method:**

### **Western blot**

Western blot analysis was performed on extracting protein from fibroblasts derived from Patient 1 and 29. Three control proteins were extracted from control fibroblast cell lines from healthy, unrelated individuals (3 years old, 24 years old and 26 years old). Cells were lysed in radioimmunoprecipitation assay buffer [150 mM NaCl, 1.0% IGEPAL® CA-630, 0.5% sodium deoxycholate, 0.1% SDS, 50 mM Tris (Sigma)], to which Protease Inhibitor Tablets were added to avoid proteolytic degradation (Pierce Protease Inhibitor Tablets, ThermoFisher), for 1 hr in ice, vortexing intermittently, followed by centrifugation at 14,600 rpm for 10-15 minutes at 4° C to retrieve the supernatants. Total protein concentrations were determined by Bicinchoninic acid protein assay (Pierce™). Protein lysates were diluted 1:1 with Nu PAGE LDS sample buffer, and resolved by % PAGE, transferred onto nitrocellulose membrane and incubated in blocking solution [Phosphate-Buffered Saline (PBS), 3% ECL blocking agent, 0.1 % Tween-20] for 1 h at room temperature, followed by overnight incubation with primary antibody at 4° C [anti-SPTAN1, 1:1000 dilution; abcam D8B7, ab11755; Anti-Actin, Sigma, 1:5000 dilution]. Membranes were washed with PBS-T [Phosphate-Buffered Saline, 0.1% Tween-20] five times for five minutes followed by incubation with secondary antibody (HRP conjugated anti-mouse) for 1hr at room temperature. Blots were visualized by chemiluminescence using the Amersham ECL Prime Substrate [ECL Prime Luminol Enhancer Solution, ECL Primer Peroxide Solution, 1:1 dilution]. Results were analysed with a densitometric analysis using BioRad Image Lab™ software and “lane and bands” tool. Calculation was done using a relative relationship method. Actin was used as housekeeping protein. The adjusted volumes of SPTAN1 bands were normalized over the adjusted volume of beta-actin.

### **Immunocytochemistry and confocal microscopy**

Primary fibroblasts of Patients 1 and 29 were primarily seeded onto sterilised glass coverslips for 48 hr in a 6-well plate. Post treatments, cells were fixed with 4% paraformaldehyde (PFA) (Sigma-Aldrich, F8775) for 20 minutes. After 3x phosphate buffered saline (PBS) washes, cells were treated with blocking and permeabilization solution (10% FBS, 0.25% Triton-X-100 in PBS) at room temperature (RT) for 30 minutes. Cells were then incubated at 4°C overnight in antibody solution (10% FBS in PBS) containing primary mouse anti-SPTAN1 antibody (1:200 dilution; D8B7, ab11755), detecting  $\alpha$ II-spectrin. After 3x PBS washes, cells were incubated with goat anti-mouse 488 Alexa Fluor secondary antibody (1:2000 dilution; Thermo Fisher Scientific, A11029), and Hoechst 33342 (1:2000 dilution; Thermo Fisher Scientific, 62249) nuclear staining in 10% FBS/PBS for 1 hr at RT. After extensive washing in PBS, cells were embedded and cover-slipped in mounting solution (Dako; Agilent Technologies). The resultant immunostaining was observed using a 40x oil immersion objective on a Zeiss LSM 710 confocal microscope and representative Z-stack images were acquired using the Zen 2009 imaging software (Zeiss).

## Case studies

*Patient I* is a 41-years-old lady diagnosed with HSP at 12 years old. At the age of 8, she presented with walking difficulties and frequent falls, slowly progressing leg weakness and stiffness. By the age of 15, crutches were required for ambulation. Currently, she presents with a spastic and scissoring gait, and she can walk with assistance for 30 minutes. She also reports occasional urinary and fecal urgency and incontinence. At neurological examination, there is bilateral lower limb hypertonia and muscle weakness (MRC grade 0 in bilateral hip flexion, 2 in hip abduction, 3 on knee extension and 0 on knee flexion), and hyperreflexia with positive crossed abductor jerks. No impairment is documented regarding vibration, joint position and temperature sense. She never experienced seizures and her cognitive function is not impaired. Brain MRI is unremarkable.

*Patient II* is a 19 year old gentleman that was first noted to be ataxic during an admission to hospital at 15 months of age, with pneumococcal meningitis presenting with a febrile seizure. Prior to this episode of meningitis, the patient had mild developmental delay. Ataxic symptoms progressed in early childhood and at the age of 4 were assessed as severe. There was progressive significant truncal limb ataxia with no associated weakness. The patient has severe global developmental delay and intellectual disability. There was three febrile seizures in early childhood. The patient was educated in a special needs school and as a young adult continues to require assistance with all activities of daily living. He is able to mobilise with a 4 wheeled walking frame with the assistance of one person. He can communicate in basic sentences but speech can be difficult to understand due to dysarthria. He is able to recognise letters the alphabet, but is not able to read, write or hold a pen. He is able to feed himself with a spoon, and wears a nappy for toileting. The patient interests are said to be aligned to that of a 4 year old. MRI brain scan at the age of 4 identified severe cerebellar atrophy and a slightly dilated 4th ventricle. Imaging was repeated at the age of 7 and showed no interval changes. Extensive neurometabolic investigations were unremarkable.

**Table S1: *SPTANI* probably damaging variants in the 100K GP cohorts** Cases were defined as all 100K GP<sup>(1)</sup> probands recruited under hereditary ataxia/hereditary spastic paraplegia , while ‘controls’ were all remaining individuals recruited in the 100K GP except those recruited under neurological and neurodevelopmental disorders or metabolic disorders. Variants were defined as rare (MAF < 1X 10<sup>-5</sup>) and either protein-truncating variants (essential splice site, frameshift, and nonsense) or missense variants predicted to be pathogenic by 2 in-silico tools (CADD<sup>(2)</sup>, Polyphen <sup>(3)</sup>).

| <b>Rare <i>SPTANI</i> variants</b> | <b>Cases (HSP/HA)</b> | <b>Controls</b> |
|------------------------------------|-----------------------|-----------------|
| Yes                                | 12                    | 52              |
| No                                 | 1,130                 | 23,795          |
| Total                              | 1,142                 | 23,847          |

**Table S2: *SPTANI* (NM\_001130438.3) variants reported in the study and in silico prediction score.** hg38 positions, exons and domains localization are given. CADD score (phred)<sup>(2)</sup> are given for missenses, nonsenses and splice variant. *In silico* prediction score SIFT<sup>(4)</sup> (0: damaging, 1: benign) and PolyPhen2<sup>(3)</sup> (1: damaging, 0: benign) were used for missenses, MaxEnt (positive if delta > 10%) and splice AI (splice-altering if > 0.2) for splicing variant. Classification of variants was performed according to the guidelines of the American College of Medical Genetics.<sup>(5)</sup> DL: splice donor loss, wt: wild, P: Pathogenic, LP: Likely Pathogenic, VUS: Variant of unknown significance, D: Damaging, B: Benign, E: Exon.

| Family  | Seg       | Variant class     | Position (hg38;chr9)    | E     | Codon change   | Amino acid change      | Domain                         | CADD | In silico prediction     |                    | ACMG criteria             | ACMG classification |
|---------|-----------|-------------------|-------------------------|-------|----------------|------------------------|--------------------------------|------|--------------------------|--------------------|---------------------------|---------------------|
|         |           |                   |                         |       |                |                        |                                |      | SIFT: D                  | PolyPhen2: D       |                           |                     |
| 1,2,3,4 | denovo AD | missense          | 128566795               | 2     | c.55 C>T       | p.Arg19Trp             | Repeat 0, Helix C              | 26.6 | SIFT: D                  | PolyPhen2: D       | PS1,PS2,PS3,PM2, PP2, PP3 | P                   |
| 16      | denovo    | nonsense          | 128578151               | 9     | c.1127G>A      | p.Trp376*              | Repeat 4, Helix A              | 38.0 | /                        | /                  | PVS1,PS2,PM2              | P                   |
| 18      | denovo    | deletion (DEL4)   | 128,582,754-128,587,726 | 14-20 | c.1711-?       | p.571-?                | Repeat 4, Helix C              | /    | /                        | /                  | PVS1_strong, PS2, PM4     | LP                  |
| 13      | AD        | nonsense          | 128583149               | 15    | c.1879C>T      | p.Arg627*              | Repeat 6, Helix B              | 38.0 | /                        | /                  | PVS1, PM2, PP1            | LP                  |
| 11      | sporadic  | nonsense          | 128584285               | 17    | c.2197C>T      | p.Arg733*              | Repeat 7, Helix B              | 38.0 | /                        | /                  | PVS1,PM2,PM6              | P                   |
| 15      | denovo    | frameshift        | 128585796               | 19    | c.2612del      | p.Lys871Serfs*5        | Repeat 8, Helix C              | /    | /                        | /                  | PVS1,PS2,PM2              | P                   |
| 21      | denovo    | deletion (DEL5)   | 128,587,422-128,600,316 | 19-25 | /              | p.(Ala927_Lys1193del)  | Repeat 9, Helix B - SH3 domain | /    | /                        | /                  | PVS1_moderate, PS2, PP4   | LP                  |
| 14      | denovo    | deletion (DEL3)   | 128591376-128600369     | 22-27 | /              | p.(Asp1003_Lys1193)del | Repeat 10, linker, SH3 domain  | /    | /                        | /                  | PVS1_moderate, PS2        | LP                  |
| 7       | sporadic  | deletion (DEL1)   | 128,597,905-128,602,892 | 24-25 | /              | p.(Asp1139_Lys1193)del | Repeat 10, Helix B SH3 domain  | /    | /                        | /                  | PVS1_moderate             | VUS                 |
| 8       | sporadic  | splice            | 128600117               | 25    | c.3519+2T>G    | p.?                    | Intronic                       | 33.0 | MaxEnt: wt:10.28 --> 2.6 | SpliceAI: DL(1)    | PVS1_moderate, PP3        | VUS                 |
| 25      | unknown   | synonymous splice | 128608049               | 33    | c.4344G>A      | Q1448=                 | Repeat 13, Helix A             | 24.1 | MaxEnt: wt:6.99 --> 3.84 | SpliceAI: DG(0.55) | PP4                       | VUS                 |
| 17      | denovo    | missense          | 128608175               | 34    | c.4390C>T      | p.Arg1464Trp           | Repeat 13, Helix A             | 26.3 | SIFT: D                  | PolyPhen2: B       | PS2,PM2,PP2,PP3           | LP                  |
| 10      | AD        | frameshift        | 128608243               | 34    | c.4458delA     | p.Lys1486Asnfs*51      | Repeat 13, Helix B             | /    | /                        | /                  | PVS1,PM2,PP1              | P                   |
| 20      | sporadic  | frameshift        | 128608261               | 34    | c.4476del      | p.Ala1493Argfs*44      | Repeat 13, Helix B             | /    | /                        | /                  | PVS1,PM2                  | P                   |
| 9       | denovo    | deletion (DEL2)   | 128,609,213-128,613,675 | 35-40 | c.4687-?       | p.1563-?               | Repeat 14, Helix B             | /    | /                        | /                  | PVS1_strong, PS2          | LP                  |
| 12      | denovo    | nonsense          | 128612139               | 39    | c.4936C>T      | p.Gln1646*             | Repeat 14, Helix C             | 39.0 | /                        | /                  | PVS1,PS2,PM2              | P                   |
| 22      | unknown   | inframe del       | 128625940               | 48    | c.6247_6249del | p.Lys2083del           | Repeat 19, Helix C             | /    | /                        | /                  | PM2,PM4                   | VUS                 |

|    |          |             |           |    |                |                             |                     |      |         |                 |                              |     |
|----|----------|-------------|-----------|----|----------------|-----------------------------|---------------------|------|---------|-----------------|------------------------------|-----|
| 5  | sporadic | missense    | 128626481 | 49 | c.6370C>T      | <b>p.Arg2124Cys</b>         | Repeat 19, A/B loop | 34.0 | SIFT: D | PolyPhen2: D    | PM2,PP2,PP3                  | VUS |
| 19 | AD       | missense    | 128627420 | 50 | c.6611G>A      | <b>p.Arg2204Gln</b>         | Repeat 19, Linker   | 35.0 | SIFT: D | PolyPhen2:<br>D | PM1,PM2,PP1,PP2,PP3          | LP  |
| 24 | denovo   | inframe del | 128627423 | 50 | c.6619_6621del | <b>p.Glu2207del</b>         | Repeat 19, Linker   | /    | /       | /               | PS1,PS2,PS3,PM2,<br>PM4,PP4  | P   |
| 23 | denovo   | missense    | 128632175 | 53 | c.6811G>A      | <b>p.Glu2271Lys</b>         | Repeat 20, Helix B  | 33.0 | SIFT: D | PolyPhen2: D    | PS1,PS2,PM2,PP2,PP3,<br>PP4  | P   |
| 26 | denovo   | inframe dup | 128632271 | 53 | c.6908_6916dup | <b>p.Asp2303_Leu2305dup</b> | EF-Hand I           | /    | /       | /               | PS1, PS2, PS3, PM2, PM4, PP4 | P   |
| 6  | unknown  | missense    | 128633243 | 56 | c.7343C>T      | <b>p.Ser2448Phe</b>         | EF-Hand II          | 25.1 | SIFT: D | PolyPhen2:<br>B | PP2,PP3                      | VUS |

**Table S3: DynaMut prediction outcomes for the missense variants identified in the study.** DynaMut<sup>(6)</sup> insilico tool was used for prediction of protein stability based on the following models; p.Arg19Trp: 3F31<sup>(7)</sup>, p.Arg1464Trp: 3fb2<sup>(8)</sup>, p.Arg2124Cys: predicted template from Phyre2<sup>(9)</sup> based on crystal structure of repeats 15 and 16 of chicken brain2 alpha spectrin (1u5p-A), p.Arg2204Gln and p.Glu2271Lys: predicted template from Phyre2 based on crystal structure of the rod domain of alpha-actinin (1hci-B), p.Ser2423Phe : Phyre build on cryoEM structure of chicken gizzard smooth muscle alpha-actinin (1sjj-B).

| <b>Missense variant</b> | <b><math>\Delta\Delta G</math> prediction outcome</b> | <b><math>\Delta</math> Vibrational Entropy Energy Between Wild-Type and Mutant(<math>\Delta\Delta S_{Vib}</math> ENCoM)</b> |
|-------------------------|-------------------------------------------------------|-----------------------------------------------------------------------------------------------------------------------------|
| <b>p.Arg19Trp</b>       | -0.674 kcal/mol (Destabilizing)                       | 0.095 kcal.mol <sup>-1</sup> .K <sup>-1</sup> (Increase of molecule flexibility)                                            |
| <b>p.Arg1464Trp</b>     | 1.242 kcal/mol (Stabilizing)                          | -4.870 kcal.mol <sup>-1</sup> .K <sup>-1</sup> (Decrease of molecule flexibility)                                           |
| <b>p.Arg2124Cys</b>     | -0.936 kcal/mol (Destabilizing)                       | 1.717 kcal.mol <sup>-1</sup> .K <sup>-1</sup> (Increase of molecule flexibility)                                            |
| <b>p.Arg2204Gln</b>     | -0.237 kcal/mol (Destabilizing)                       | 0.233 kcal.mol <sup>-1</sup> .K <sup>-1</sup> (Increase of molecule flexibility)                                            |
| <b>p.Glu2271Lys</b>     | -0.538 kcal/mol (Destabilizing)                       | -0.056 kcal.mol <sup>-1</sup> .K <sup>-1</sup> (Decrease of molecule flexibility)                                           |
| <b>p.Ser2448Phe</b>     | 0.676 kcal/mol (Stabilizing)                          | -0.118 kcal.mol <sup>-1</sup> .K <sup>-1</sup> (Decrease of molecule flexibility)                                           |

**Table S4: Insilico predictions of missense *SPTANI* (NM\_001130438.3) previously reported variants.** Conservation study of *SPTANI* throughout Metazoa was predicted “High” if the same amino acid is conserved in most Cnidaria and Lophotrochozoa species; “Moderate” if the amino acid of the same family is found in most Cnidaria and Lophotrochozoa species; and “Low” if the amino acid is poorly conserved in most Cnidaria and Lophotrochozoa species. Variants reported in the current study are in bold.



| HGVSc       | HGVSp                | CADD | SIFT    | PolyPhen2 | Conservation (metazoa) | Grantham score | References                                      |
|-------------|----------------------|------|---------|-----------|------------------------|----------------|-------------------------------------------------|
| c.55C>T     | <b>p.Arg19Trp</b>    | 25,8 | 0,0 D   | 1,0 D     | High                   | 101            | Von de Vondel, 2022 ; <b>Morsy, 2022</b>        |
| c.271G>A    | p.Glu91Lys           | 32   | 0,003 D | 1,0 D     | Moderate               | 56             | Gilissen, 2014                                  |
| c.362G>T    | p.Arg121Lys          | 30   | 0,01 D  | 0,401 B   | Low                    | 26             | An, 2014                                        |
| c.533G>A    | p.Gly178Asn          | 27,2 | 0,001 D | 0,992 D   | High                   | 80             | Syrbe, 2017                                     |
| c.917C>T    | p.Ala306Val          | 24   | 0,292 T | 0,998 D   | High                   | 64             | Syrbe, 2017                                     |
| c.1303T>G   | p.Ser435Ala          | 22,9 | 0,297 T | 0,245 B   | Low                    | 99             | Bagnall, 2014                                   |
| c.1697G>C   | p.Arg566Pro          | 29,9 | 0,002 D | 0,997 D   | Moderate               | 103            | Hamdan, 2012                                    |
| c.2572G>T   | p.Ala858Ser          | 20,8 | 0,307 T | 0.0 B     | Moderate               | 99             | Leveille, 2019                                  |
| c.3292C>T/A | p.Arg1098Cys/Ser/Gln | 31   | 0,002 D | 1,0 D     | High                   | 180            | Miazek 2020, Hernandez 2021, Von de Vondel 2022 |
| c.3716A>G   | p.His1239Arg         | 27,3 | 0,01 D  | 0,96 D    | Moderate               | 29             | Syrbe, 2017                                     |
| c.4162A>G   | p.Ile1388Val         | 24,1 | 0,034 D | 0,498 B   | High                   | 29             | Xie, 2021                                       |
| c.4283C>G   | p.Ala1428Gly         | 21,6 | 0,078 T | 0,004 B   | Low                    | 60             | Bobbili, 2014 ; Leveille, 2019                  |
| c.4390C>T   | <b>p.Arg1464Trp</b>  | 24,7 | 0,0 D   | 0,012 B   | Moderate               | 101            | <b>Morsy, 2022</b>                              |
| c.4828C>T   | p.Arg1610Trp         | 25   | 0,0 D   | 0,109 B   | High                   | 101            | Syrbe, 2017                                     |
| c.4846G>A   | p.Asp1616Asn         | 23,1 | 0,704 T | 0,045 B   | Low                    | 23             | Terrone, 2020                                   |
| c.4870C>T   | p.Arg1624Cys         |      | 0,021 D | 0,998 D   | Low                    | 180            | Von de Vondel, 2022                             |
| c.5326C>T   | p.Arg1776Trp         | 28,2 | 0,001 D | 1,0 D     | Moderate               | 101            | Syrbe, 2017                                     |
| c.5936A>G   | p.Glu1979Gly         | 32   | 0,002 D | 0,979 D   | Moderate               | 98             | Von de Vondel, 2022                             |
| c.6184C>T   | p.Arg2062Trp         | 28,5 | 0,0 D   | 1,0 D     | High                   | 101            | Syrbe, 2017                                     |
| c.6370C>T   | <b>p.Arg2124Cys</b>  | 29,9 | 0,001 D | 1,00 D    | High-                  | 180            | <b>Morsy, 2022</b>                              |
| c.6611G>A   | <b>p.Arg2204Gln</b>  | 32   | 0,00 D  | 0,997 D   | High-                  | 43             | <b>Morsy, 2022</b>                              |
| c.6614A>C   | p.Gln2205Pro         | 24,4 | 0,00 D  | 0,232 B   | High-                  | 76             | Von de Vondel, 2022                             |
| c.6811G>A   | <b>p.Glu2271Lys</b>  | 32   | 0,004 D | 0,995 D   | High                   | 56             | <b>Morsy, 2022</b>                              |
| c.6927G>C   | p.Met2309Ile         | 27,6 | 0,007 D | 0,656 PD  | High                   | 10             | Leveille (2019)                                 |
| c.6947A>C   | p.Gln2316Pro         | 29,7 | 0,002 D | 0,96 D    | High                   | 76             | Stavropoulos (2016)                             |
| c.7343C>T   | <b>p.Ser2448Phe</b>  | 28,4 | 0,019 D | 0,994 D   | Low                    | 155            | <b>Morsy, 2022</b>                              |

**Supp. Figures :**

**Figure S1: IGV for *SPTANI* gene deletion in family 7.**

IVG\_2.4.4 visualization of deleted regions identified in family 7 (patient 9; DEL1: arr{hg38}9q34.11(128,597,905-128,602,892)x1)

# Family 7

P9

DELL1

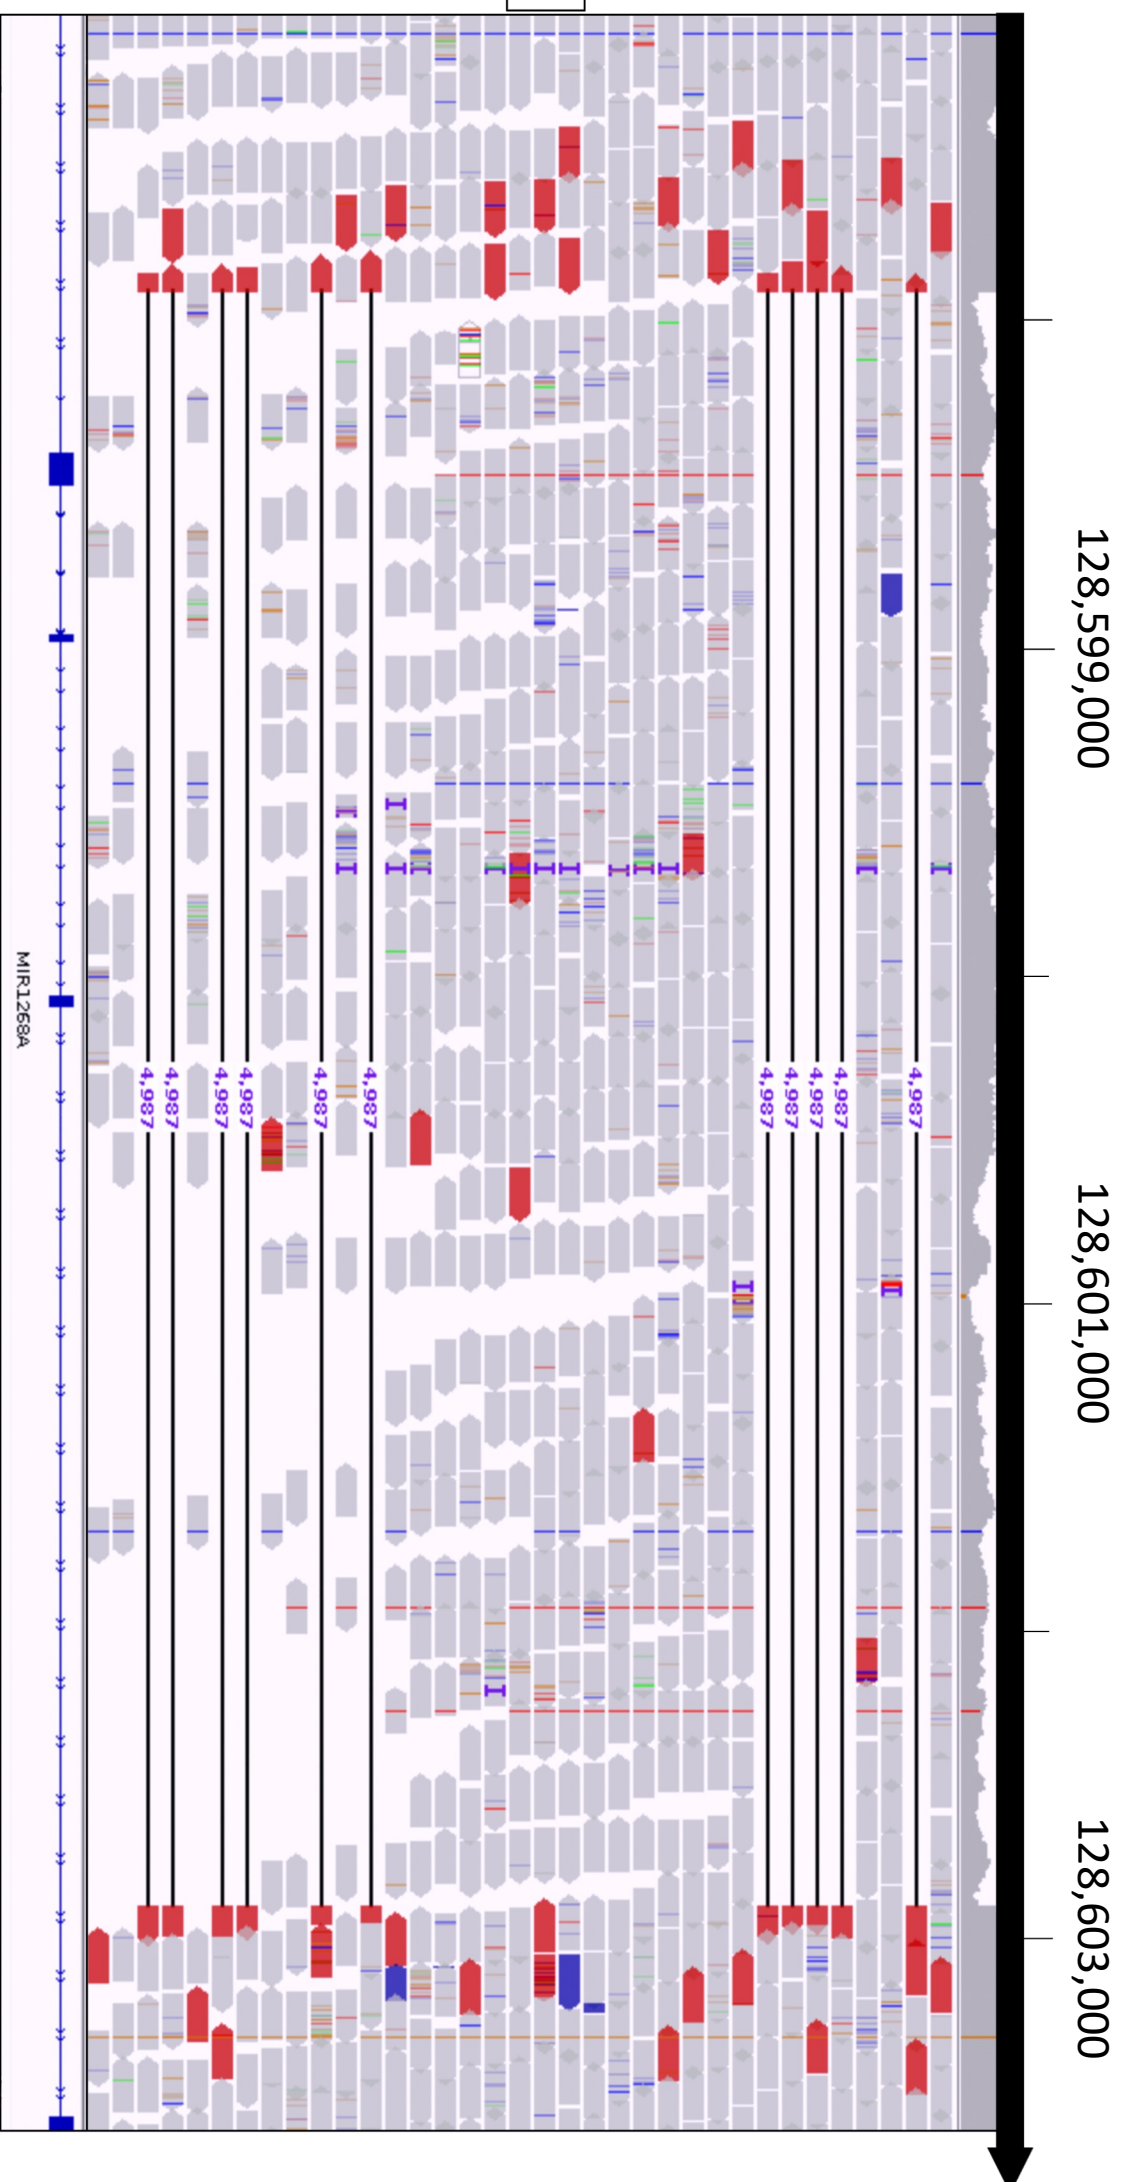

**Figure S1: Structural impact of *SPTANI* missense variants.**

Model of human spectrin protein shown in UCSF Chimera software. For each missense variant: the model used for simulation is on the top with the position of variant highlighted in red, the wild-type (left) and mutated (right) amino acid and their surroundings are shown in close-ups. The position of each disease-associated variant is highlighted in red. Affected residues and neighbouring residues within a 5.0-Å range are shown as sticks and side chains are coloured by element (carbon = grey, oxygen = red, nitrogen = blue, hydrogen = white). Hydrogen bonds as identified by UCSF Chimera built-in tools are represented by light blue lines. Steric clashes and pseudo-bonds as identified by UCSF Chimera built-in tools are represented by red and yellow lines, respectively. <sup>(10)</sup> Orthologous gene conservation through several metazoa species are shown for affected and neighbouring residues with corresponding EVE Visual score <sup>(11)</sup> (red: pathogenic; white: benign). (H.s: Homo sapiens; D.m: Drosophila melanogaster; O.b: Octopus bimaculoides; O.f: Orbicella faveolata; E.d: Exaiptasia diaphana T.a: Trichoplax adherens).

A) R19W: Simulation of p. Arg19Trp missense variant based on crystal structure of the N-terminal region of  $\alpha$ II-spectrin Tetramerization Domain (3F31).<sup>(7)</sup> Variant causes multiple disruption as it eliminates 2 hydrogen bonds with neighbouring isoleucine at position 15 and Glutamine at position 147 of B chain. Also, it induces steric clashes with Leucine residues at positions 78 and 146 of B chain.

B) R1464W: Analysis was based on the Crystal structure of the human brain alpha spectrin repeats 15 and 16 (3fb2).<sup>(8)</sup> Arginine at position 1464 is located within the A-helix of Spectrin repeat number 13. The change of Arginine to Tryptophan is predicted to cause moderate impact with 36 steric clashes with neighbouring Phenylalanine and Leucine residues at positions 1467 and 1536, respectively.

C) R2204Q: 3D Modelling done on predicted template from Phyre2 <sup>(9)</sup> based on crystal structure of the rod domain of alpha-actinin (1hci-B), with 99% of the sequence modelled with 99.8% confidence. Substitution of Arg2204 by Glutamine in spectrin repeat 20 is predicted to cause moderate disruption, with introduction of 16 steric clashes with adjacent Leucine at position 2119.

D) E2271K: The same model as R2204Q was used. However, the Substitution of Glutamic acid 2271 in spectrin repeat 20 by Lysine is predicted to be tolerated, with no steric clashes.

E) R2124C: 3D Modelling done on predicted template from Phyre2 <sup>(9)</sup> based on crystal structure of repeats 15 and 16 of chicken brain2 alpha spectrin (1u5p-A), with 90% of sequence modelled with 99.9% confidence. This substitution is tolerated since it eliminates hydrogen bonds with adjacent Aspartate residue at position 2284 and do not introduce steric clashes.

F) S2448F: Modelling based on template generated by Phyre build on cryoEM structure of chicken gizzard smooth muscle alpha-actinin (1sjj-B), with 93% of the sequence have been modelled with 99.5% confidence. This substitution in C terminal of spectrin protein is tolerated since it does not introduce steric clashes.



## **Supp.Videos:**

**Video S1:** Phenotype of patient 1 with the recurrent *SPTANI* p. Arg19Trp variant, exhibiting a spastic and scissoring gait.

**Video S2:** Ataxic phenotype of nine-month-old C57BL/6J mouse with p. Arg1098Gln variant showing obvious motor and coordination difficulty. Mouse model was generated by Miazek et al.<sup>(12)</sup>

## References:

1. Davies MD, Leila Elbahy, Tom Fowler, Sue Hill, Tim Hubbard, Luke Jostins, Nick Maltby, Jeanna Mahon-Pearson, Gil McVean, Katrina Nevin-Ridley, Matthew Parker, Vivienne Parry, Augusto Rendon, Laura Riley, Clare Turnbull, Kerrie Woods. The National Genomics Research and Healthcare Knowledgebase. figshare.Dataset 2017.
2. Kircher M, Witten DM, Jain P, O'Roak BJ, Cooper GM, Shendure J. A general framework for estimating the relative pathogenicity of human genetic variants. *Nat Genet.* 2014;46(3):310-5.
3. Adzhubei IA, Schmidt S, Peshkin L, Ramensky VE, Gerasimova A, Bork P, et al. A method and server for predicting damaging missense mutations. *Nat Methods.* 2010;7(4):248,9.
4. Vaser R, Adusumalli S, Leng SN, Sikic M, Ng PC. SIFT missense predictions for genomes. *Nat Protoc.* 2016;11(1):1-9.
5. Richards S, Aziz N, Bale S, Bick D, Das S, Gastier-Foster J, et al. Standards and guidelines for the interpretation of sequence variants: a joint consensus recommendation of the American College of Medical Genetics and Genomics and the Association for Molecular Pathology. *Genet Med.* 2015;17(5):405-24.
6. Rodrigues CH, Pires DE, Ascher DB. DynaMut: predicting the impact of mutations on protein conformation, flexibility and stability. *Nucleic Acids Res.* 2018;46(W1):W350-W5.
7. Mehboob S, Song Y, Witek M, Long F, Santarsiero BD, Johnson ME, et al. Crystal structure of the nonerythroid alpha-spectrin tetramerization site reveals differences between erythroid and nonerythroid spectrin tetramer formation. *J Biol Chem.* 2010;285(19):14572-84.
8. Evans RJ, Davies DR, Bullard JM, Christensen J, Green LS, Guiles JW, et al. Structure of PolC reveals unique DNA binding and fidelity determinants. *Proc Natl Acad Sci U S A.* 2008;105(52):20695-700.
9. Kelley LA, Mezulis S, Yates CM, Wass MN, Sternberg MJ. The Phyre2 web portal for protein modeling, prediction and analysis. *Nat Protoc.* 2015;10(6):845-58.



10. Pettersen EF, Goddard TD, Huang CC, Couch GS, Greenblatt DM, Meng EC, et al. UCSF Chimera--a visualization system for exploratory research and analysis. *J Comput Chem.* 2004;25(13):1605-12.
11. Frazer J, Notin P, Dias M, Gomez A, Min JK, Brock K, et al. Disease variant prediction with deep generative models of evolutionary data. *Nature.* 2021;599(7883):91-5.
12. Miazek A, Zalas M, Skrzymowska J, Bogin BA, Grzymajlo K, Goszczynski TM, et al. Age-dependent ataxia and neurodegeneration caused by an alphaII spectrin mutation with impaired regulation of its calpain sensitivity. *Sci Rep.* 2021;11(1):7312.
